# Supplementary material
Source: PubMed Central journal article supplement (PMC10238656)
Supplement: NIHMS1880023-supplement-12.pdf [file NIHMS1880023-supplement-12.pdf]

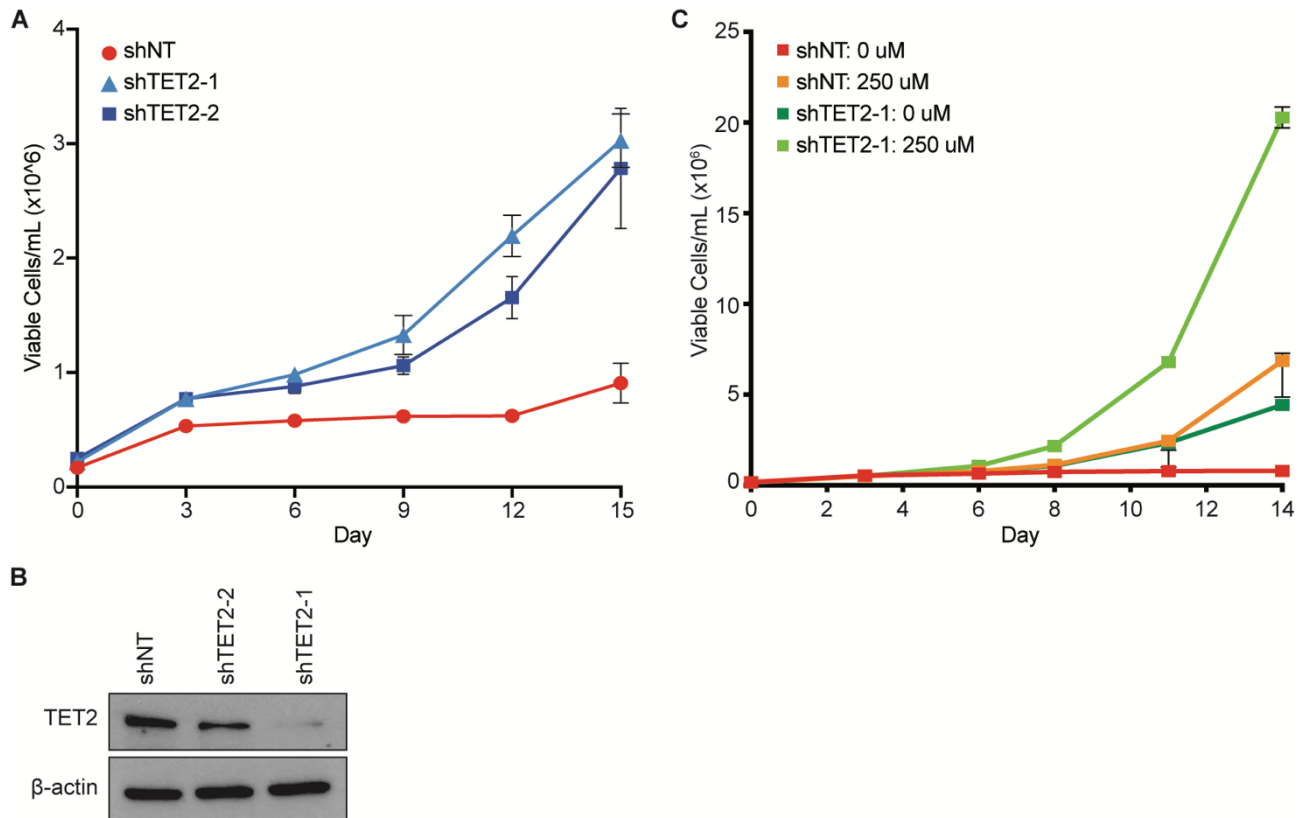

**Supplementary Figure S1: Characterization of isogenic TF-1 cell lines expressing *TET2*-targeting shRNAs.** (A) Proliferation under cytokine-poor conditions of TF-1 cells expressing a non-targeting shRNA (shNT) or one of two shRNAs targeting *TET2* mRNA (shTET2). (B) Immunoblot analysis of *TET2* expression in TF-1 cells infected with lentiviruses expressing the indicated shRNAs. Cells in (A-B) were passaged for 21 days after lentiviral infection prior to cytokine withdrawal and immunoblot analysis. (C) Proliferation under cytokine-poor conditions of TF-1 cells expressing a non-targeting shRNA (shNT) or an shRNA targeting *TET2* mRNA (shTET2-1) after pre-treatment for two weeks with vehicle (DMSO) or 250  $\mu$ M TFMB-(R)-2HG. Shown in (A-C) are representative results from three independent experiments.
