# Supplementary material
Source: PubMed Central journal article supplement (PMC10238656)
Supplement: NIHMS1880023-supplement-13.pdf [file NIHMS1880023-supplement-13.pdf]

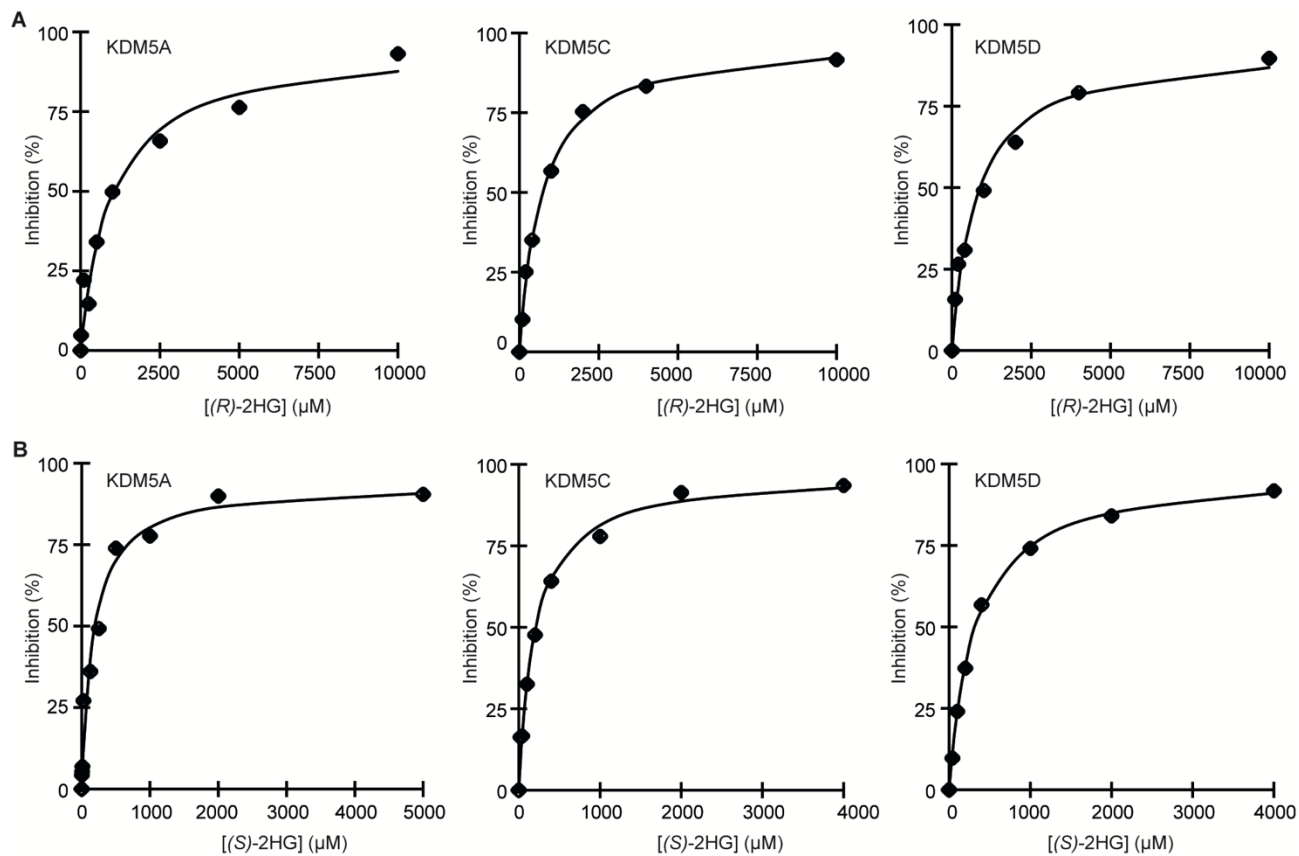

**Supplementary Figure S2: Inhibition of KDM5 enzymes by the (*R*)- and (*S*)-enantiomers of 2-hydroxyglutarate.** Representative  $\text{IC}_{50}$  curves of KDM5A, KDM5C, and KDM5D for (*R*)-2HG (**A**) and (*S*)-2HG (**B**).
