# Supplementary material
Source: PubMed Central journal article supplement (PMC10238656)
Supplement: NIHMS1880023-supplement-14.pdf [file NIHMS1880023-supplement-14.pdf]

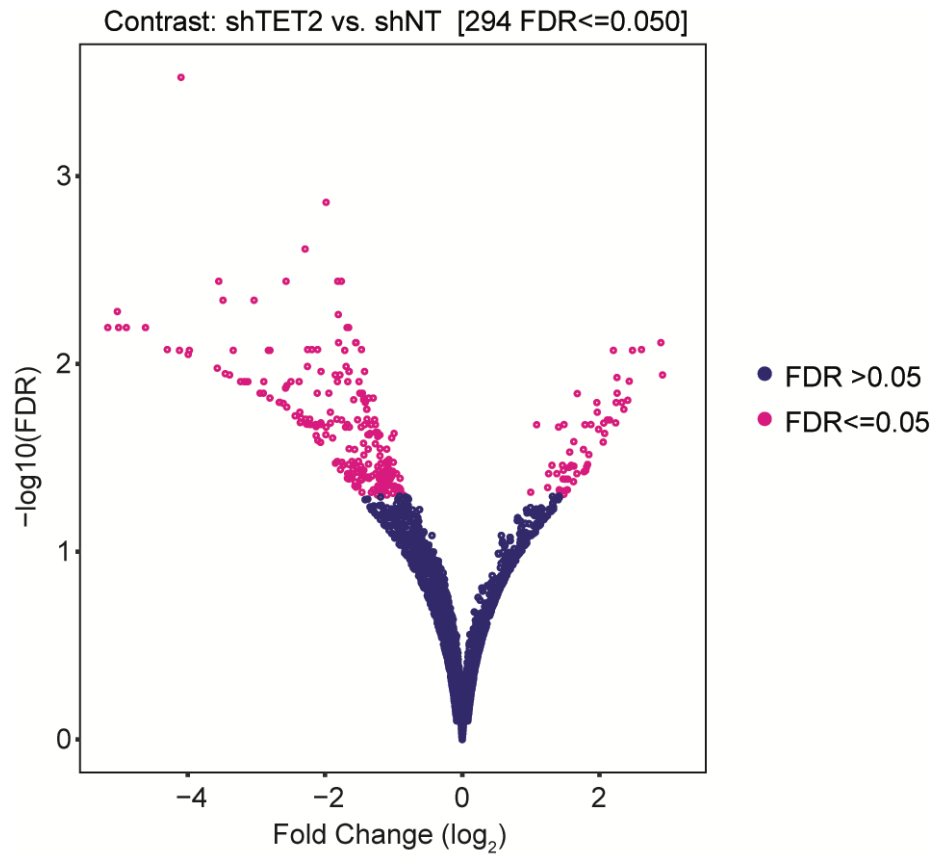

**Supplementary Figure S3: Trimethyl-H3K4 is not enriched upon knock-down of TET2 in TF-1 cells.** Volcano plot illustrating the relative enrichment of trimethyl-H3K4 in isogenic TF-1 cell lines expressing one of two TET2-targeting shRNAs when compared to TF-1 cells expressing a non-targeting shRNA.
