# Supplementary material
Source: PubMed Central journal article supplement (PMC10238656)
Supplement: NIHMS1880023-supplement-15.pdf [file NIHMS1880023-supplement-15.pdf]

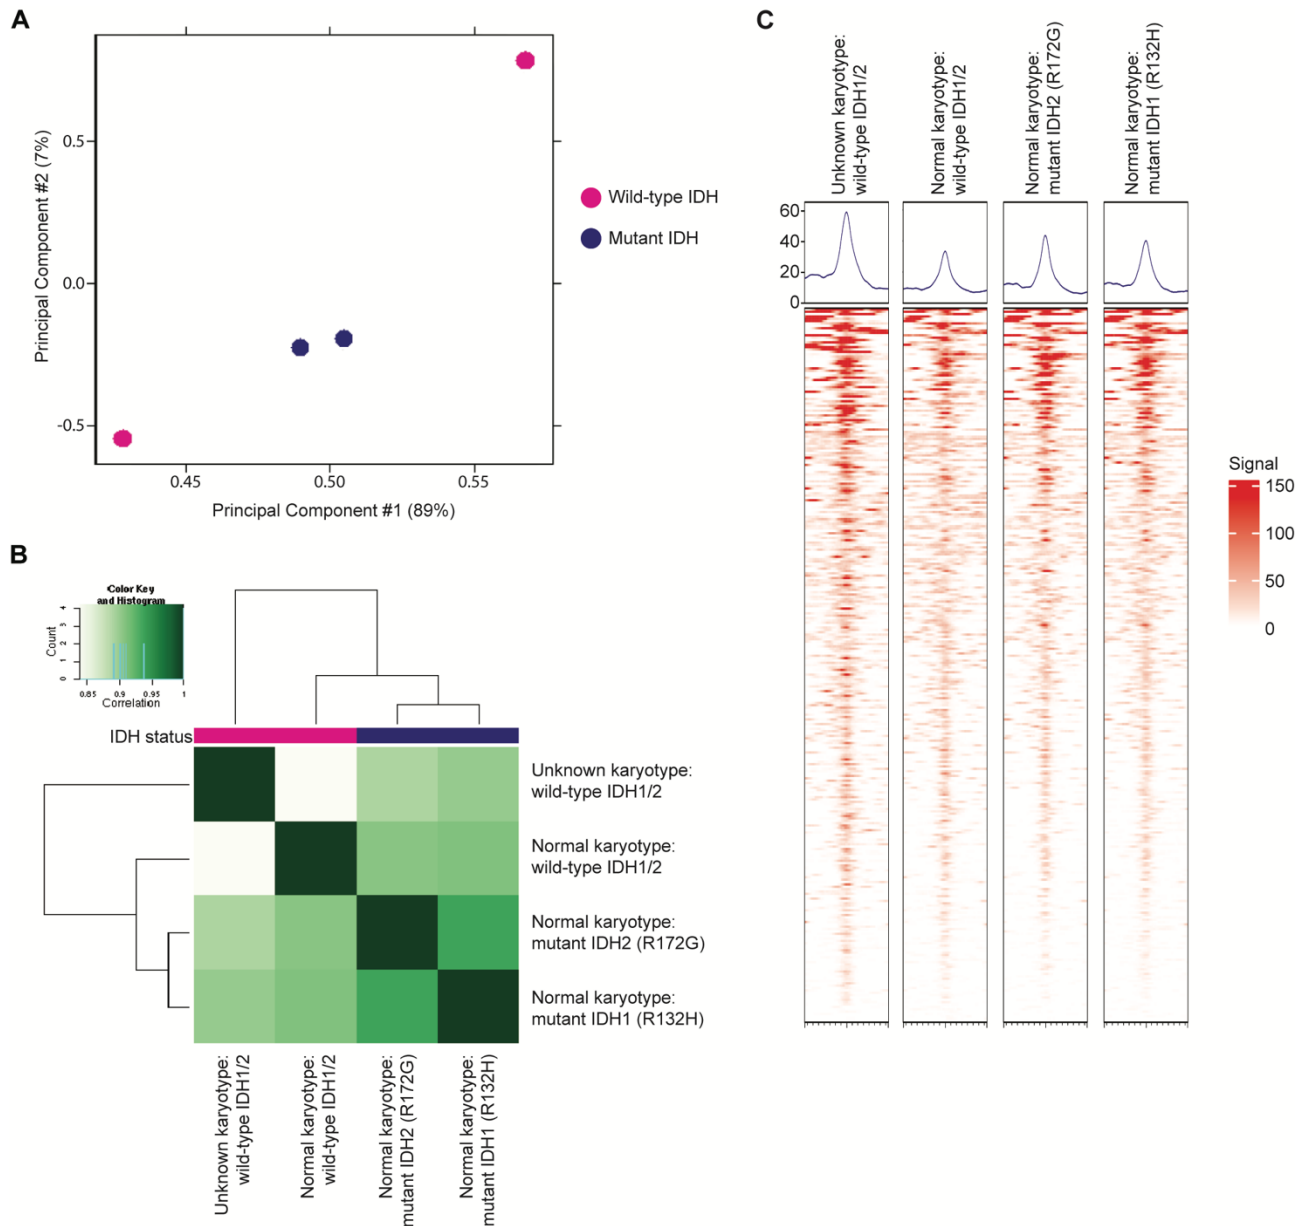

**Supplementary Figure S4: ChIP-seq analysis of primary AML patient samples. (A)** Principal Component Analysis of the primary AML patient samples. **(B)** Correlation heatmap based on all normalized data from the primary AML patient samples. **(C)** Tornado plots of the trimethyl-H3K4 ChIP-seq signals at all trimethyl-H3K4 peak sites in the primary AML patient samples.
