# Supplementary material
Source: PubMed Central journal article supplement (PMC10238656)
Supplement: NIHMS1880023-supplement-16.pdf [file NIHMS1880023-supplement-16.pdf]

**A**

```

          *                               *
KDM5A (56) DWQPPFACEVKSFRFTPR---FGSGFPVKDGRRKILPEE (435)
KDM5B (69) DWQPPFACDVKLHFTPR---FGSGFPVRDGKIKLSPEE (451)
KDM5C (51) DWQPPFAVEVDNFRFTPR---FGSGFPVSDSKRHILTPEE (466)
KDM5D (51) DWQPPFAVEVDNFRFTPR---FGSGFPVSNSKQNLSPPEE (456)

```

**B**

| Enzyme      | ( <i>R</i> )-2HG Ki ( $\mu$ M) | ( <i>S</i> )-2HG Ki ( $\mu$ M) |
|-------------|--------------------------------|--------------------------------|
| KDM5A       | 203 $\pm$ 43                   | 81 $\pm$ 4                     |
| KDM5A F68L  | 144 $\pm$ 37                   | 31 $\pm$ 13                    |
| KDM5A R429I | 161 $\pm$ 47                   | 68 $\pm$ 33                    |
| KDM5B       | 655 $\pm$ 153                  | 303 $\pm$ 51                   |

**Supplementary Figure S5: KDM5A mutants.** (A) Sequence alignment of KDM5 residues predicted to be involved in 2OG binding [RefSeq accession numbers: NM\_001042603.3 (KDM5A); NM\_006618.5 (KDM5B); NM\_004187.5 (KDM5C); NM\_004653.5 (KDM5D)]. (B) Ki values for (*R*)-2HG and (*S*)-2HG of the indicated KDM5 variants. Results shown are the mean  $\pm$  standard deviation of two independent assays.
