# Supplementary material
Source: PubMed Central journal article supplement (PMC10238656)
Supplement: NIHMS1880023-supplement-17.pdf [file NIHMS1880023-supplement-17.pdf]

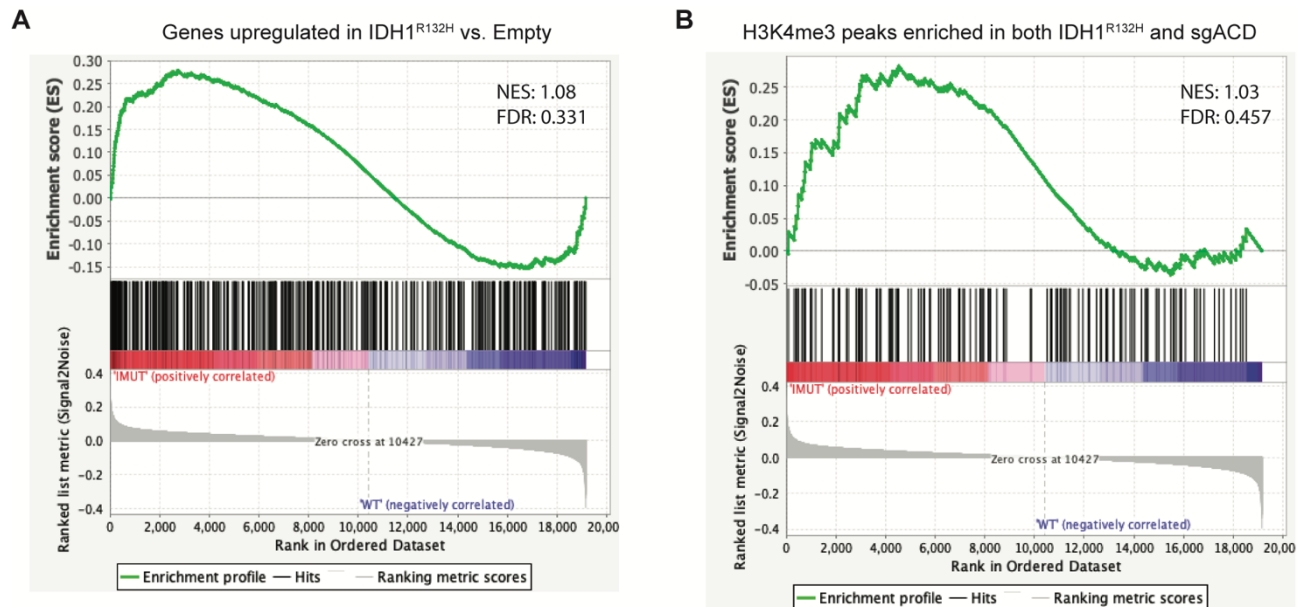

**Supplementary Figure S6: Transcriptional analysis of primary AML patient samples. (A)** GSEA was performed on expression data from GSE24505 [26] using the set of genes upregulated  $\geq 1.5$ -fold with an adjusted p-value of  $< 0.05$  in TF-1 cells expressing R132H-mutant IDH1 ( $IDH1^{R132H}$ ) when compared with TF-1 cells expressing empty vector control (Empty) ( $n=341$  genes). **(B)** GSEA was performed on expression data from GSE24505 using the set of genes associated with H3K4me3 peaks that are enriched in both  $IDH1^{R132H}$ -expressing TF-1 cells and TF-1 cells expressing Cas9 and sgRNAs targeting *KDM5A*, *KDM5C* and *KDM5D* (sgACD) when compared to empty vector control-expressing TF-1 cells and TF-1 cells expressing Cas9 and three non-targeting sgRNAs, respectively ( $n=144$  genes). Expression data for the primary patient samples was derived from samples with an *IDH1* or *IDH2* mutation ( $n=49$ ) and samples *wild-type* for *IDH1* and *IDH2* ( $n=306$ ).
