# Supplementary material
Source: PubMed Central journal article supplement (PMC10238656)
Supplement: NIHMS1880023-supplement-18.pdf [file NIHMS1880023-supplement-18.pdf]

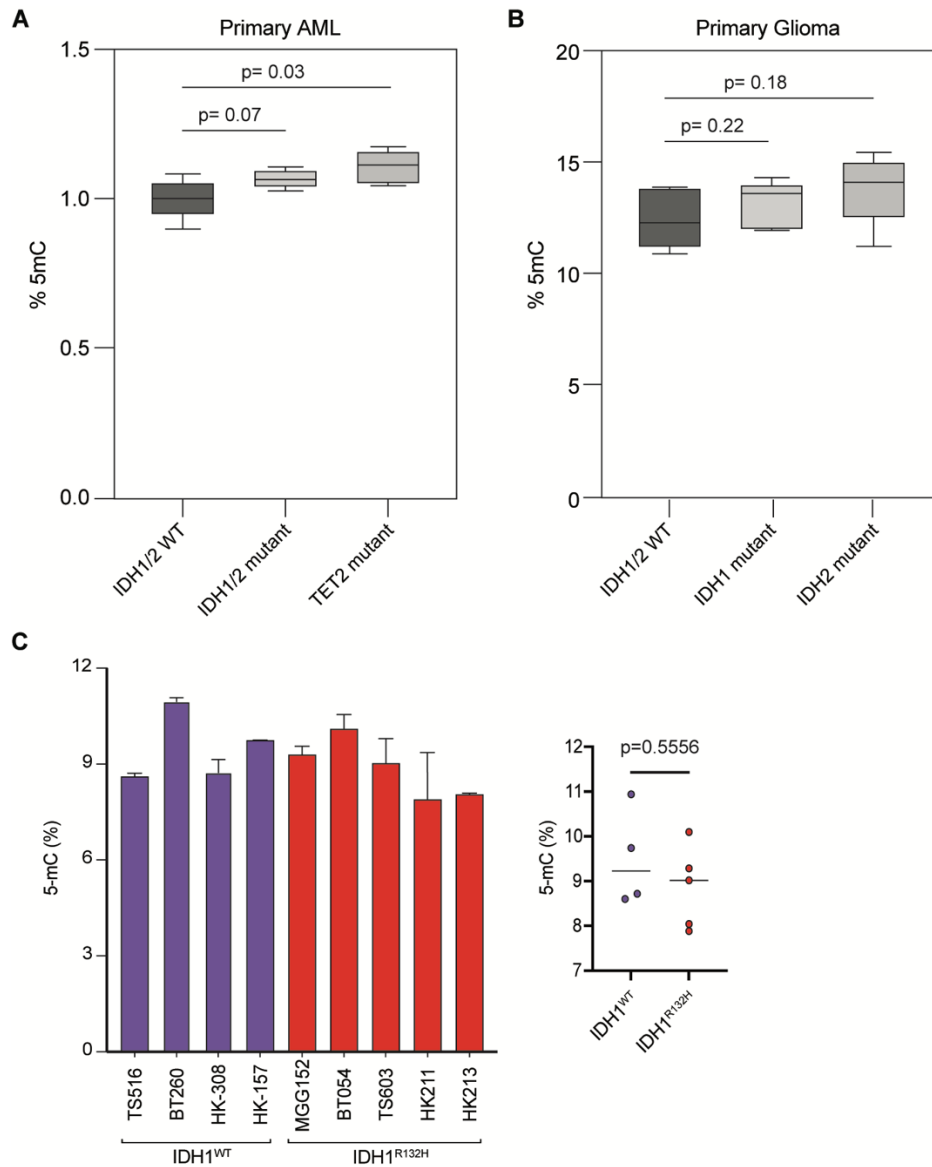

**Supplementary Figure S7: 5mC levels in primary AML and primary glioma samples and in MCTS lines.** (A-C) Total and median 5mC content in primary *IDH-wild-type* (IDH1/2<sup>WT</sup>) (n=6), *IDH1-mutant* (IDH1<sup>MUT</sup>) (n=11) and *IDH2-mutant* (IDH2<sup>MUT</sup>) (n=5) glioma patient samples (A); in primary *IDH wild-type* (IDH1/2<sup>WT</sup>) (n=5), *IDH-mutant* (IDH1/2<sup>MUT</sup>) (n=8) and *TET2-mutant* (TET2<sup>MUT</sup>) (n=5) AML patient samples (B); and in *IDH1 wild-type* (IDH1<sup>WT</sup>) and *IDH1 R132H-mutant* (IDH1<sup>R132H</sup>) patient-derived glioma multicellular tumor spheroid (MCTS) lines (C), as measured by LC-MS.
