# Supplementary material
Source: PubMed Central journal article supplement (PMC10238656)
Supplement: NIHMS1880023-supplement-20.pdf [file NIHMS1880023-supplement-20.pdf]

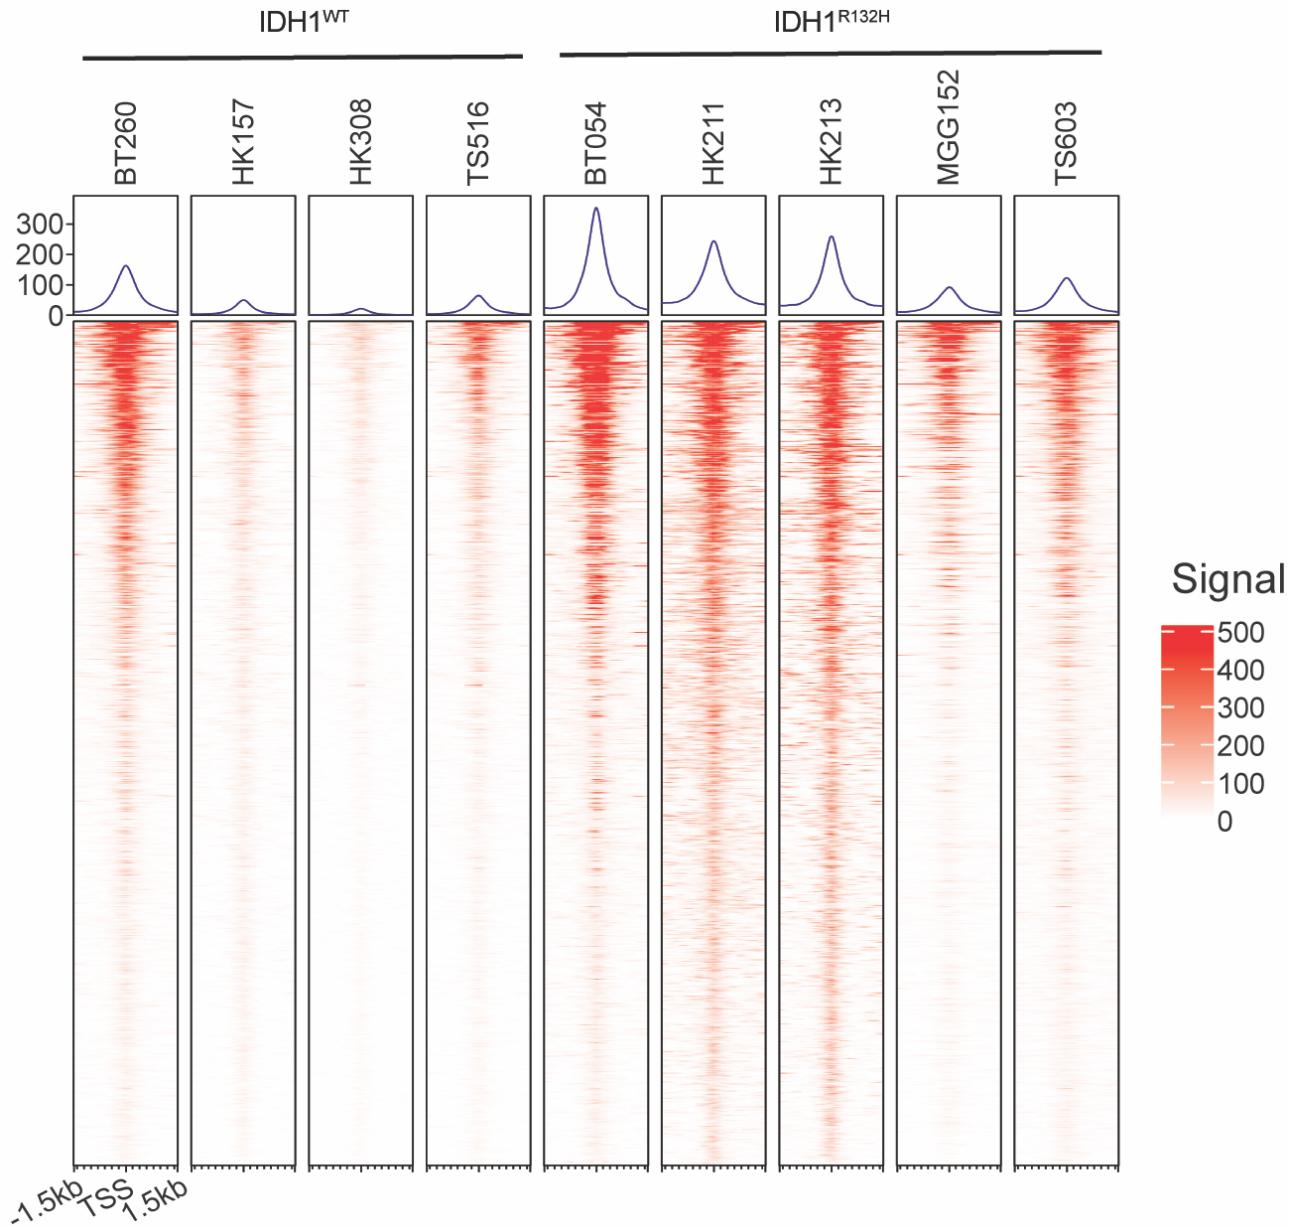

**Supplementary Figure S9: Genomic regions marked by increased trimethyl-H3K4 are enriched in *IDH1*-mutant glioma MCTS lines when compared to *IDH1*-wild-type MCTS lines.** Individual tornado plots of the trimethyl-H3K4 ChIP-seq signals at sites showing differential enrichment in  $IDH1^{WT}$  (n=4) and  $IDH1^{R132H}$  (n=5) glioma MCTS lines (see also **Figure 5F**).
