# Supplementary material
Source: PubMed Central journal article supplement (PMC10238656)
Supplement: NIHMS1880023-supplement-21.pdf [file NIHMS1880023-supplement-21.pdf]

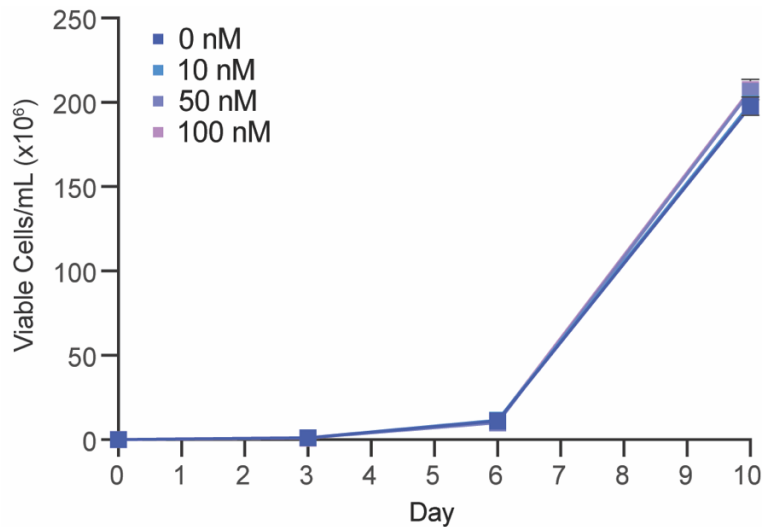

**Supplementary Figure S10: Prolonged exposure to MLL inhibitor VTP50469 does not affect the proliferation of TF-1 cells grown under cytokine-rich conditions.** Proliferation in GM-CSF-containing media of parental TF-1 cells after pretreatment with the indicated concentrations of the MEN1-MLL1 inhibitor VTP50469 or DMSO-control (0 nM) for two weeks prior to day 0.
